# Supplementary material for: An integrated cell atlas of the human lung in health and disease
Source: Research Square preprint supplement (doi:10.21203/rs.3.rs-1438584/v1), 2022-03-15
Supplement: Supplementary file 9 [file fe8e1758851c178a272fc3d7.xlsx]

## Sheet: Sheet1
Data used:	Fig. 2	Fig. 3	Fig. 4	Fig. 5	Fig. 6	Ext. Fig. 1	Ext. Fig. 2	Ext. Fig. 3	Ext. Fig. 4	Ext. Fig. 5	Ext. Fig. 6	Ext. Fig. 7	Ext. Fig. 8	Ext. Fig. 9	Ext. Fig. 10	Ext. Fig. 11	Ext. Fig. 12	Ext. Fig. 13	Ext. Fig. 14	Ext. Fig. 15	Ext. Fig. 16	Ext. Fig. 17
HLCA core	a, b, c	a, b, c (high-entropy cluster only), d, e, f (rare cell clusters only), g (DCs only)	a, b (only cell types as indicated), c (only cell types as indicated)				x	x (high-entropy cluster only),	x (subcompartments as indicated)	x (subcompartment as indicated)	a, c (dendritic cells only)	a, b, c, d (cell types as indicated)	a, b (cell types as indicated)					x
HLCA core subset for benchmarking	d					x					b
HLCA core + healthy lung dataset (Meyer_2021)				a, b, e (fibroblast clusters only)										a, b, c, d (Meyer_2021 cells only), e (Meyer_2021 cells only)			a, b, c
HLCA core + lung cancer dataset (Thienpont_2018)				c (endothelial cells only)											a, b, c, d, e (Thienpont_2018 cells only), f (Thienpont_2018 cells only), g (Thienpont_2018 cells only)	a, b, c, d (for all: endothelial cell clusters only)
HLCA core + IPF dataset (Sheppard_2020)				c (IPF dataset only), d (IPF dataset only, cell types as indicated)																	x (IPF dataset only, subsetted to cell types as indicated)
HLCA core + GWAS summary statistics				d
HLCA extended					a (core + extension), b (extension only)														x (extension datasets, only those studies containing transferred label migratory DCs)	x (extended datasets only)		x (7 datasets with harmonized cell type labels)
